# Supplementary material for: Evaluation of tropospheric ozone and ozone precursors in simulations from the HTAPII and CCMI model intercomparisons – a focus on the Indian Subcontinent
Source: Copernicus journal article supplement (doi:10.5194/acp-2018-1235), 2018-12-07
Supplement: Supplementary file [file acp-2018-1235-AC1-supplement.pdf]

Response to reviews of “Evaluation of tropospheric ozone and ozone precursors in simulations from the HTAPII and CCMI model intercomparisons - a focus on the Indian Subcontinent”.

We would like to thank the editor and the two reviewers for their time in handling and reviewing our manuscript. We reply below to each of the reviewers comments in turn.

#### Reviewer 1

*O<sub>3</sub> pollution over Indian subcontinent causes considerable losses in the crop productivity and affects human health leading also to pre-mature mortalities. Considering scarcity of in situ measurements in the region, manuscript by Hakim et al. presenting the comparison of ozone simulations among several models and with available observations is of great interest.*

*Comment 1: Manuscript is recommended for publication in the Atmospheric Chemistry and Physics. Following comments and suggestions should be considered during the revision. Comparison of model results are primarily made with urban / semi-urban environments. I agree with authors (Page 1, l:31–33 and Page 28, l: 8–10) that global models, due to coarse resolution could have limitation in reproducing local influences. It might be useful to also compare with recent observations considerably away from major anthropogenic influences, such as Nainital (Sarangi et al., 2014).*

Firstly, we would like to thank Prof. Ojha for his time in reviewing our manuscript. We agree that this paper should be of wide interest as we evaluate the output from multiple models with the widest array of observations of O<sub>3</sub> collected to-date. The ground based observations used in this study were obtained from a network of monitoring stations under the MAPAN project (run by the Indian Institute of Tropical Meteorology, Pune, India). Each station is designed to be as similar as possible in its micro-environment (e.g. placement relative to large obstructions etc.) and the sites are located away from road sides in more open areas – albeit in urban regions. Of the sites we investigated all but one (Lodhi Road, Delhi) can be classified as semi-urban (similar to the UK London Ealham site, part of the UK DEFRA network). The Lodhi Road site itself is classified as an urban-background site. Thus these MAPAN sites are not measuring at the direct emission sources but are reflective of the wider urban atmosphere. For some regions this will inevitably be quite heterogenous but for larger places, such as Delhi, the levels of NO<sub>x</sub>, CO and subsequently O<sub>3</sub> are relatively similar across the region. Clearly global models will struggle to reproduce the road side concentrations next to emission sources but we argue that the wider scale features of the urban composition should be reproducible by these models and that the comparison against these data is instructive. Rural observations are very scarce across the world and particularly in India (largely given that the monitoring focus is around human exposure to pollution and compliance). We have been in contact with the authors of the Sarangi study and would have liked to have included a comparison against the data from Nainital but to this date we have not had any reply and so have omitted it from our analysis. As we recommend in the abstract “a higher density of long term monitoring sites measuring not only ozone but also ozone precursors including speciated VOCs, located in more rural regions of the

Indian sub-continent, would enable improvements in assessing the biases in models run at the resolution found in HTAPII and CCM1". We hope that in the future these measurements are made and that follow up studies can assess them.

*Comment 2: Why Delhi site is considered as semi-urban? where average values of NOx up to 180 ppbv (Page:17, l:28–29) indicate strong anthropogenic influences. It is possibly better to classify this site as urban. In addition, in the text, a mention of O<sub>3</sub>, CO, NOx observational values should also be mentioned from other stations in Delhi (e.g. Sharma et al., 2016) (which would be within a grid box of global models). This would provide a more general range of NOx bias over Delhi, which seems as of now very high (based on values at single location in the region of strongest variability).*

We agree with Prof. Ojah that the Lodhi Road station in Delhi has very high NOx levels and its classification as a semi-urban site was wrong. We clarify this by amending the classification as an urban-background site in the text. Interestingly the Lodhi road is inside a relatively green area and is well away from the road-side pointing to very widespread issues with NOx pollution in Delhi. More detailed work looking at the atmospheric composition across Delhi is planned for the future.

*Comment 3: Figure 4 and Page 13, l.10–13: This analysis is very useful and tells clearly over which regions models differed with each other, more strongly. The text "This is worse than.....Europe and North America" should include quantitative information on what are typical % standard deviations (or range) seen in MIPs over Europe and North America, for a ready reference here itself.*

The section of the text Prof. Ojha is referring to compares the relative variability in the models surface O<sub>3</sub> we have looked at across the Indian subcontinent (Figure 4) with the variability shown by Young et al (2013) for the ACCMIP models. The statement we made was overly negative and we have revised this in the main text.

We have also added in as the referee suggest some text to explain based on Young et al (2013) what typical relative variability in the models surface O<sub>3</sub> there is in the more studied regions of North America and Europe.

The revised text now reads: "The standard deviation of the multi model ensemble is shown in Figure 4. The standard deviation of the multi model mean can be used as an indicator of the level of agreement between the models. Here we show that there is a reasonably low level of agreement between the models, with an average of 23% standard deviation in the mean. This is slightly worse than the level of agreement between the ACCMIP models over the same region shown in Young et al., 2013 (< 20% standard deviation in the mean) and could reflect the fact that here we compare simulations from two different MIPs which make use of different emissions. However, we find the difference between the emissions within models of a particular MIP is as large as those between MIPs (Figures 1, S2 and S3). Figure 4 highlights that models differ most in the northern and eastern part of India and

standard deviation is the least in the central part of India. For the more well studied regions such as North America and Europe, Young et al. (2013) show that global model multi model analyses have similar if not slightly larger variability than over the Indian sub-continent. Young et al. (2013) show that the variability in the South East USA is very high, > 30%, across the ACCMIP models, which is likely linked to the impacts of different biogenic emissions (not specified in MIP protocols) and chemistry over this isoprene rich area.”

*Comment 4: Page 14, l.9–10: “In all locations....than observations”. No, Jabalpur mean model values seem well within 1-sigma of the observed values. Check and modify the statement suitably.*

We thank the reviewer for highlighting this and have modified the manuscript accordingly. The text now reads “In seven out of eight, the ozone mixing ratio is higher in the MMM than in the observations (except Jabalpur, where MMM is within 1-sigma deviation).”

*Comment 5: Page 19, l.11–16: Pl. check for a consistency in this text. L.13 says that at Jabalpur correlation is poor, then it is said that “models show good correlation at all sites” in l.15.*

Again, we thank Prof. Ojah and correct the text to read: “The model simulations capture the seasonal variability in monthly mean CO well (R-values > 0.4 for all models) at most locations; the exception is in Hyderabad where all models generally show a negative correlation with the observations and at Jabalpur where correlation is poor (see section S5 of supplementary material). Interestingly, the model simulations at Jabalpur and Hyderabad show lowest correlations with the observations in spite of having the lowest biases. This could point towards some important processes which the models are struggling to simulate but further work would be needed to clarify this. The site with the best correlation is Udaipur, where the MMM correlation coefficient is 0.96. Models are in agreement with the observed CO at all sites but highly underestimate the observed values at Delhi and Patiala.”

*Comment 6: Page 20, l.8–9: High levels of tropospheric ozone columns (TOC) are attributed to anthropogenic activities and biomass burning. While for surface ozone it could be the driver, tropospheric column ozone could have considerable contribution from long-range transport and Stratosphere-to-Troposphere Transport (STT) (see e. g. Ojha et al., 2017). I do not see any mention of these aspects here. Is it possible to further compare whether stratospheric contributions among models are similar to each other or they differ significantly? This could corroborate the finding (Page 21, l.2–4) that the CCM1-UKCA produces highest surface ozone but not the TOC, indicating potential influence of processes (other than regional emissions) affecting the inter-comparison of model TOC.*

We agree with Prof. Ojah that this is an interesting area to analyse further and identify the role of strat-trop-transport of O<sub>3</sub> (STT-O<sub>3</sub>) across the region. Indeed, in his work he has shown that this is an important processes in some regions of the

domain we have assessed. However, to do this systematically requires that all models have a diagnostic of the STT-O<sub>3</sub> (sometimes called the O3S tracer) and this was not available for the models we've looked at. However, a follow up study would nicely compare the bias in the simulated O<sub>3</sub> with this tracer.

*Comment 7: Page 24, Figure 13: Model simulations were said to be for period 2008–2010 (Abstract: Page 1, l.21). For comparison with CARBIC observations during 2008, why model data for 2010 is used (and not for same year 2008). Did I miss something here?*

We are sorry about the confusion here. We've only used model data for one year (2009 for HTAPII-HADGM 2010 for all other models). We will change the abstract and tidy the text to make the point clearer. We were unable to find any CARBIC data for 2010 and instead used the most recent data we could find which is for 2008. Comparing the model output for 2009 and 2010 against CARBIC data for 2008 doesn't change the picture and we wanted to stick with a consistent base model year (2010).

Minor Comments:

*Page 7, l. 22: delete “traditionally”; and consider changing “observation poor” to “observationally sparse”*

Minor comment 1 – Done.

*Page 10, l.1–4: The sentence should be reframed.*

Minor comment 2 – Done.

Page 16, l.23 and Page 17, l.13: “between models” to “among models”

Minor comment 3 – Changed as requested.

Page 25, l.9–10: This is not clear. Do you mean that model profiles over the Chennai airport are used for comparison? If yes then write so

Minor comment 4 – Thanks for the comment, we have changed the text to clarify this. The text now reads “Model data refer to the average monthly mean model profiles over Chennai airport that coincide with aircraft observations, also interpolated to 25hPa vertical pressure bins.”

Page 25, l.16–17: “The levels of CO ..are generally worse in comparison...”. consider rewording the sentence.

Minor comment 5 – Done. The corrected text now reads “The levels of model simulated CO in the pre-monsoon LT generally show higher biases as compared to the ozone levels. HTAPII-MOZT simulates the pre-monsoon LT carbon monoxide

levels in good agreement with the observations, but highly overestimates the UT values and generally overestimates the CO mixing ratios in the post- and monsoon periods.”

Page 25, 1.22: Correct “2010” to “2008”

Minor comment 6 – Corrected accordingly.
